# Supplementary material for: Plasma Extracellular Vesicle Characteristics as Biomarkers of Resectability and Radicality of Surgical Resection in Pancreatic Cancer—A Prospective Cohort Study
Source: MDPI journal article supplement (doi:10.3390/cancers15030605), 2023-01-18
Supplement: s1 [file s1]

**Table S1.** Particles per frame for NTA measurements of plasma sEV samples.

|                                                                | <b>Study patients</b>          | <b>w/o resection</b>           | <b>With resection</b>          |
|----------------------------------------------------------------|--------------------------------|--------------------------------|--------------------------------|
|                                                                | <b>Median PPF<br/>(25-75%)</b> | <b>Median PPF<br/>(25-75%)</b> | <b>Median PPF<br/>(25-75%)</b> |
| Before surgery (N=82: 33 w/o resection, 49 with resection)     | 20.48<br>(15.29-26.93)         | 18.65<br>(14.65-24.80)         | 22.15<br>(16.00-27.50)         |
| After one month (N=53: 16 w/o resection, 37 with resection)    | 23.75<br>(16.45-33.35)         | 21.23<br>(15.70-33.54)         | 25.70<br>(18.20-32.70)         |
| After six months (N=43: 9 w/o resection, 34 with resection) 35 | 24.70<br>(19.35-32.65)         | 20.70<br>(16.00-24.00)         | 25.25<br>(19.80-33.60)         |
| After 12 months (N=29: 1 w/o resection, 28 with resection)     | 21.70<br>(17.65-31.15)         | 32 *                           | 21.65<br>(17.65-29.80)         |

PPF: particles per frame; \*: After 12 months, data for a single patient in the group without resection was available

**Table S2.** Small EV characteristics one month after surgery compared to characteristics at surgery.

| <b>EV characteristics</b>             | <b>p-Value*</b> |                                   |
|---------------------------------------|-----------------|-----------------------------------|
| <b>Study patients (N=52)</b>          |                 |                                   |
| Concentration (N*10 <sup>9</sup> /mL) | 0.483           | Rises in 28, falls in 24 patients |
| Mean diameter (nm)                    | 0.018           | Rises in 32, falls in 20 patients |
| <b>w/o resection (N=16)</b>           |                 |                                   |
| Concentration (N*10 <sup>9</sup> /mL) | 0.352           | Rises in 10, falls in 6 patients  |
| Mean diameter (nm)                    | 0.796           | Rises in 6, falls in 10 patients  |
| <b>With resection (N=36)</b>          |                 |                                   |
| Concentration (N*10 <sup>9</sup> /mL) | 0.814           | Rises in 18, falls in 18 patients |
| Mean diameter (nm)                    | 0.014           | Rises in 26, falls in 10 patients |
| <b>R0 resection (N=22)</b>            |                 |                                   |
| Concentration (N*10 <sup>9</sup> /mL) | 0.227           | Rises in 8, falls in 14 patients  |
| Mean diameter (nm)                    | 0.010           | Rises in 17, falls in 5 patients  |
| <b>R1 or R2 resection (N=14)</b>      |                 |                                   |
| Concentration (N*10 <sup>9</sup> /mL) | 0.041           | Rises in 10, falls in 4 patients  |
| Mean diameter (nm)                    | 0.397           | Rises in 9, falls in 5 patients   |

**Table S3.** Characteristics of sEV at different time intervals.

|                                          |                                       | <b>R0 resection (including<br/>border &lt;1 mm)</b> | <b>R1 or R2 resection</b> |                |
|------------------------------------------|---------------------------------------|-----------------------------------------------------|---------------------------|----------------|
|                                          | <b>Small EV characteristics</b>       | <b>Median (25-75%)</b>                              | <b>Median (25-75%)</b>    | <b>p-Value</b> |
| Before surgery (N=48: 31 R0, 17 R1+R2)   | Concentration (N*10 <sup>9</sup> /mL) | 2.68 (1.98-3.45)                                    | 1.85 (1.45-2.46)          | 0.014          |
|                                          | Mean diameter (nm)                    | 179.5 (171.8-186.1)                                 | 182.7 (166.7-194)         | 0.497          |
| After one month (N=37: 23 R0, 14 R1+R2)  | Concentration (N*10 <sup>9</sup> /mL) | 2.29 (1.83-2.88)                                    | 2.56 (1.59-3.6)           | 0.676          |
|                                          | Mean diameter (nm)                    | 183.7 (176.7-194.1)                                 | 186.2 (172.5-199.6)       | 0.988          |
| After six months (N=34: 21 R0, 13 R1+R2) | Concentration (N*10 <sup>9</sup> /mL) | 2.98 (1.92-3.31)                                    | 2.68 (1.67-3.5)           | 0.780          |
|                                          | Mean diameter (nm)                    | 181.1 (177.5-188.7)                                 | 181.4 (168.8-194.9)       | 1.000          |
| After 12 months (N=28: 20 R0, 8 R1+R2)   | Concentration (N*10 <sup>9</sup> /mL) | 2.4 (1.58-3.27)                                     | 3.08 (1.97-5.75)          | 0.199          |
|                                          | Mean diameter (nm)                    | 173.2 (163.8-186.6)                                 | 191.3 (178-198.1)         | 0.079          |

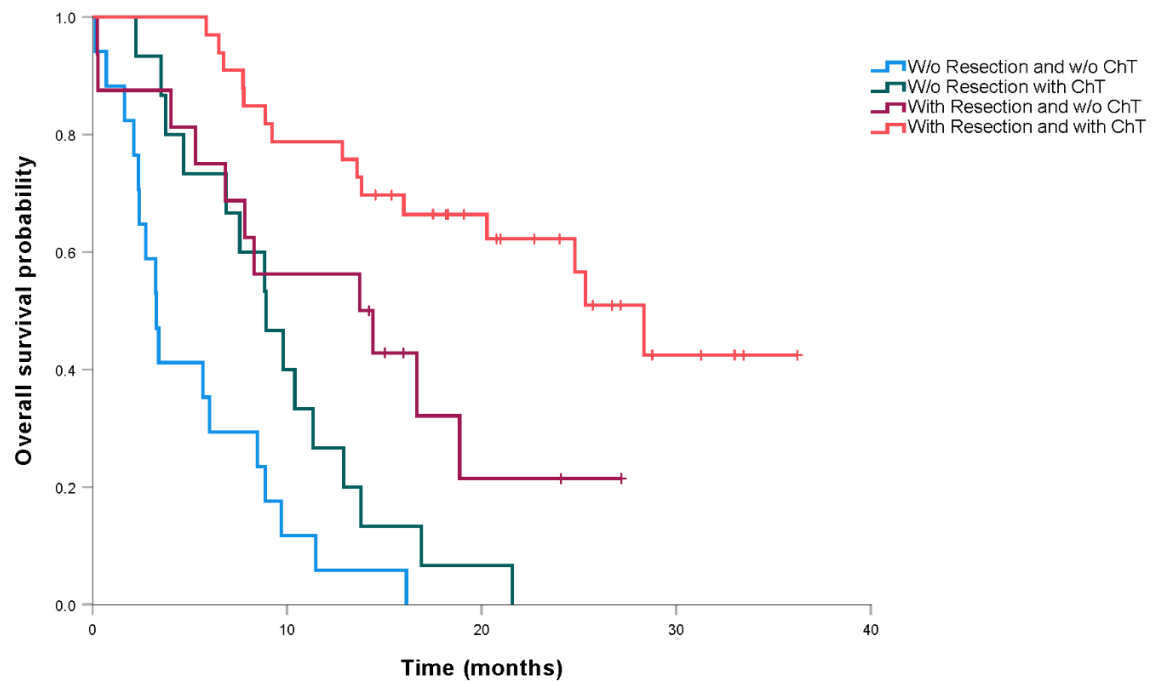

**Figure S1.** OS of patients with PDAC according to treatment modality. Patients without surgical resection and without chemotherapy demonstrated the worst OS, while patients with surgical resection and adjuvant chemotherapy had the best OS; patients without resection with only chemotherapy and those with only resection and no chemotherapy are positioned in between. w/o: without; ChT: chemotherapy; censored patients are presented with a vertical line.
